# Supplementary material for: HFSP: high speed homology-driven function annotation of proteins
Source: Oxford University Press journal article supplement (doi:10.1093/bioinformatics/bty262), 2018-04-19
Supplement: bioinformatics_34_13_i304_s1.zip [file bioinformatics_34_13_i304_s1.zip]

**Supporting online material  
for:  
HFSP: High speed homology-driven function  
annotation of proteins**

**Mahlich, Y.<sup>1,2,3\*</sup>, Steinegger, M.<sup>2,4,5</sup>, Rost, B.<sup>2,3,6,7,8</sup>, Bromberg, Y.<sup>1,3,9\*</sup>**

1 Department of Biochemistry and Microbiology, Rutgers University, 76 Lipman Dr, New Brunswick, NJ 08873, USA

2 Computational Biology & Bioinformatics - i12 Informatics, Technical University of Munich (TUM) Boltzmannstrasse 3 85748 Garching/Munich Germany

3 Institute for Advanced Study, Technische Universität München, Lichtenbergstrasse 2 a, D-85748 Garching, Germany

4 Quantitative and Computational Biology group, Max-Planck Institute for Biophysical Chemistry, Am Fassberg 11, 37077 Göttingen, Germany

5 Department of Chemistry, Seoul National University, Seoul, Korea

6 TUM School of Life Sciences Weihenstephan (WZW), Freising, Germany

7 Columbia University, Department of Biochemistry and Molecular Biophysics, Columbia University, New York, USA

8 New York Consortium on Membrane Protein Structure (NYCOMPS), New York, USA

9 Department of Genetics, Rutgers University, Human Genetics Institute, Life Sciences Building, 145 Bevier Road, Piscataway, NJ 08854, USA

**Table of Contents for Supporting Online Material**

*Supplementary Online Data*

- 1. Swiss-Prot datasets
- 2. Swiss-Prot predictions

*Supplementary Tables*

- 1. 3<sup>rd</sup> level EC categories with over 50 proteins
- 2. F1 scores for each optimization run of HFSP training

*Supplementary Figures*

- 1. Correlation string between HFSP and HSP scores

**Supplementary Data 1**

Excel file with two sheets, each containing the UniProt ID, EC number and eukaryote/prokaryote mapping of proteins in Swiss-Prot 2002 and Swiss-Prot 2017 respectively

**Supplementary Data 2**

Excel file includes multiple sheets, each containing the results of individual predictions for proteins in datasets in the manuscript. Each sheet contains 5 columns, protein\_reference, ec\_reference, protein\_prediction, ec\_prediction & hfsp\_score.

protein\_reference & protein\_prediction contain the Uniport IDs of the reference protein and the aligned protein, respectively. ec\_reference and ec\_prediction are the EC numbers of the reference protein and aligned protein, respectively. hfsp\_score is the HFSP score for the alignment.

**Table 1: 3<sup>rd</sup> level EC categories with over 50 proteins, sorted according to the number of proteins.**

| EC3    | # Proteins |
|--------|------------|
| 2.7.11 | 332        |
| 2.7.10 | 172        |
| 1.1.1  | 136        |
| 3.2.1  | 130        |
| 2.7.1  | 113        |
| 2.3.1  | 111        |
| 2.1.1  | 110        |
| 4.1.1  | 97         |
| 2.5.1  | 97         |
| 3.4.21 | 93         |
| 2.4.1  | 91         |
| 3.1.3  | 85         |
| 4.2.1  | 81         |
| 6.1.1  | 74         |
| 2.7.7  | 66         |
| 3.5.1  | 56         |
| 3.1.4  | 56         |
| 3.1.1  | 55         |
| 3.4.22 | 55         |

**Table 2: F1-scores for each optimization run of HFSP-training.**

| split | F1-score | Exponent | Factor |
|-------|----------|----------|--------|
| 1     | 0.75     | 0.33     | 770    |
| 2     | 0.74     | 0.32     | 660    |
| 3     | 0.74     | 0.32     | 660    |
| 4     | 0.74     | 0.32     | 658    |
| 5     | 0.74     | 0.34     | 823    |
| 6     | 0.74     | 0.33     | 770    |
| 7     | 0.74     | 0.33     | 770    |
| 8     | 0.73     | 0.32     | 660    |
| 9     | 0.74     | 0.33     | 770    |
| 10    | 0.73     | 0.41     | 1646   |

## Supplementary Figure 1

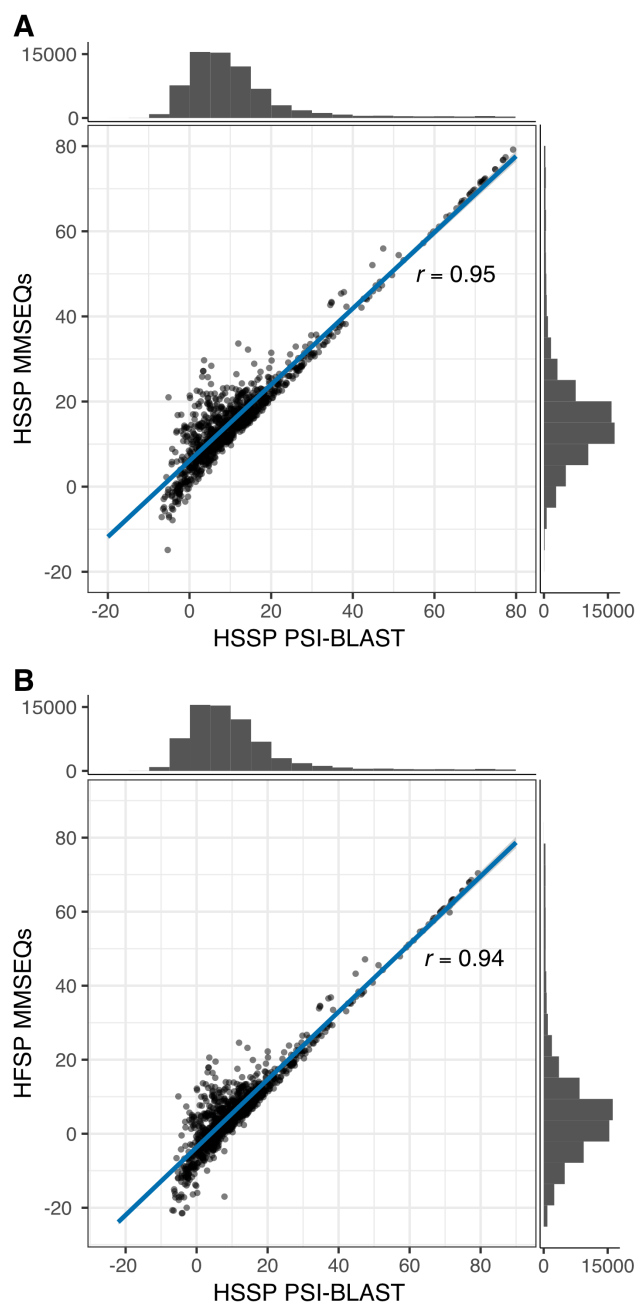

**Supplementary Fig. 1: HSP scores derived from MMSeqs2 and PSI-BLAST alignments strongly correlate.** HSP scores derived from PSI-BLAST alignments (x-axis) vs. (A) HSP scores and (B) HFSP scores derived from MMSeqs2 (y-axis). The histograms display the number of protein pairs in the respective ranges of HSP scores. In both scenarios HSP/HFSP scores derived from MMSeqs2 highly correlate with HSP scores from PSI-BLAST (Pearson-correlation coefficient = 0.95 / 0.94).

## Supplementary Figure 2

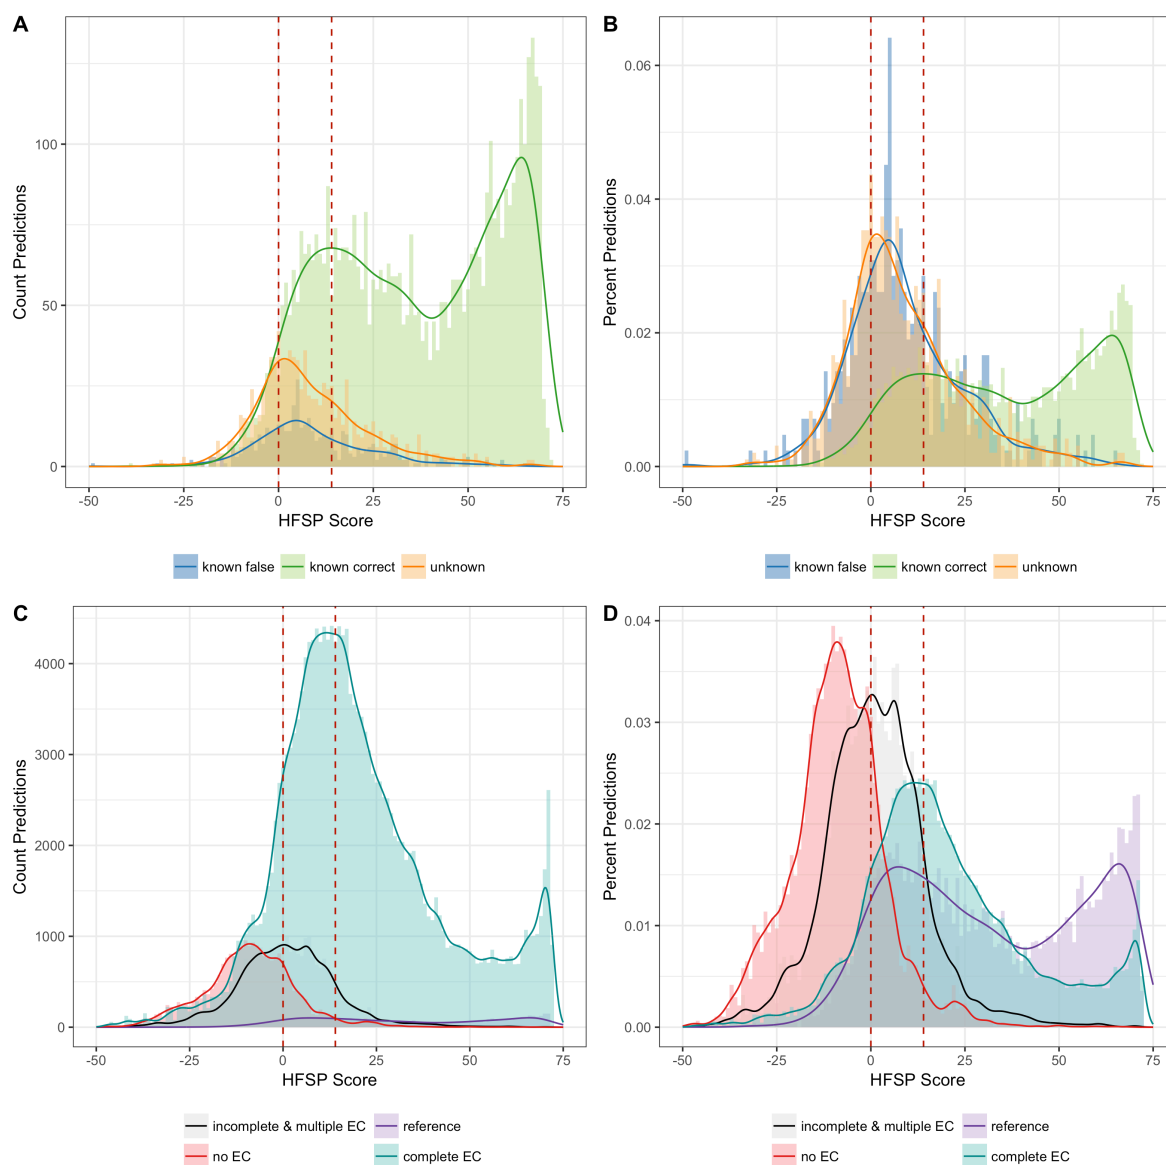

**Supplementary Fig. 2: Newly emerging enzyme functionality difficult to differentiate from incorrect function predictions.** Proteins with no known homologs – approximated by experimentally annotated proteins, which have a unique EC number (orange) – show on average smaller highest scoring HFSP hits than proteins with homologs (green – correct predictions, blue – incorrect predictions). **(A/B)** Comparison of HFSP score distributions for highest scoring protein pair for Swiss-Prot 2017, **(A)** showing the distribution of raw counts and **(B)** the corresponding percentages of the respective datasets. **(C/D)**: Panels of counts and percentages as in (A/B), data is the Comparison of HFSP distributions for different subsets of the non-reduced Swiss-Prot: (i) experimentally verified enzymes (reference - purple), (ii) not experimentally verified enzymes with EC annotation complete on all 4 levels (complete EC - teal), (iii) enzymes with incomplete or multiple EC annotations (incomplete & multiple EC – black) and (iv) proteins that are not annotated as enzymes (no EC).
